# Supplementary material for: Algorithms for Affirmative Action
Source: Atypon-hosted journal article supplement (doi:10.1287/ited.2023.0039), 2025-04-09
Supplement: ited.2023.0039.sm1.xlsx [file ited.2023.0039.sm1.xlsx]

## Sheet: Sheet1
ID	Genero	Distrito	Lista	Partido	Votos		District	# Seats
1	M	1	WE	IND1	1502		1	3
2	H	1	WE	IND2	3109		2	3
3	M	1	WE	IND3	243		3	4
4	H	1	WE	IND4	689		4	4
5	M	1	WE	IND5	363		5	6
6	M	1	WK	IND6	1697		6	8
7	H	1	WK	IND7	715		7	7
8	M	1	WK	IND8	748		8	7
9	H	1	WK	IND9	1411		9	6
10	M	1	XP	UDI	3477		10	7
11	H	1	XP	UDI	1107		11	6
12	M	1	XP	RN	780		12	6
13	H	1	XP	RN	533		13	4
14	M	1	XP	EVOPOLI	825		14	5
15	H	1	XP	EVOPOLI	1466		15	5
16	M	1	YB	PS	1522		16	4
17	H	1	YB	PL	3251		17	7
18	M	1	YB	PRO	1230		18	4
19	H	1	YB	PDC	3099		19	5
20	M	1	YB	PR	370		20	7
21	H	1	YB	PS	586		21	4
22	M	1	YQ	PCCH	3629		22	3
23	H	1	YQ	PCCH	1279		23	6
24	M	1	YQ	FREVS	1811		24	4
25	H	1	YQ	FREVS	1708		25	3
26	H	1	YQ	COMUNES	962		26	4
27	M	1	YV	IND27	1358		27	3
28	H	1	YV	IND28	1614		28	3
29	M	1	YV	IND29	592		Total	138
30	H	1	YV	IND30	804
31	M	1	YV	IND31	753
32	H	1	YV	IND32	1642
33	M	1	ZR	PTR	678
34	H	1	ZR	PTR	780
35	M	1	ZR	PTR	447
36	H	1	ZR	PTR	223
37	H	1	ID1-37	IND37	3381
38	M	1	ID1-38	IND38	6895
39	M	2	A	IND39	3771
40	H	2	A	IND40	1493
41	M	2	A	IND41	2302
42	H	2	A	IND42	1064
43	M	2	A	IND43	2469
44	M	2	E	IND44	977
45	H	2	E	IND45	2855
46	M	2	E	IND46	565
47	H	2	E	IND47	559
48	M	2	E	IND48	494
49	H	2	E	IND49	528
50	M	2	XB	IND50	1440
51	H	2	XB	IND51	763
52	M	2	XB	IND52	1254
53	H	2	XB	IND53	2057
54	M	2	XN	IND54	447
55	H	2	XN	IND55	1073
56	M	2	XN	IND56	658
57	H	2	XN	IND57	1270
58	M	2	XP	RN	1415
59	H	2	XP	RN	6131
60	M	2	XP	RN	474
61	H	2	XP	UDI	4804
62	M	2	XP	UDI	893
63	H	2	XP	UDI	1596
64	M	2	YB	PS	1170
65	H	2	YB	CIUDADANOS	599
66	M	2	YB	PDC	1215
67	H	2	YB	PR	2352
68	M	2	YB	CIUDADANOS	950
69	H	2	YB	PPD	2181
70	M	2	YQ	COMUNES	3659
71	H	2	YQ	IGUALDAD	569
72	M	2	YQ	RD	4270
73	H	2	YQ	PCCH	6789
74	M	2	YQ	FREVS	2436
75	H	2	YQ	FREVS	917
76	M	2	ZF	IND76	920
77	H	2	ZF	IND77	700
78	M	2	ZF	IND78	145
79	H	2	ZF	IND79	319
80	M	2	ID2-42	IND80	4684
81	H	2	ID2-43	IND81	3474
82	M	3	L	IND82	6081
83	H	3	L	IND83	2533
84	M	3	L	IND84	2211
85	H	3	L	IND85	2336
86	M	3	XP	RN	5163
87	H	3	XP	RN	3831
88	M	3	XP	UDI	3672
89	H	3	XP	UDI	5441
90	M	3	XP	EVOPOLI	970
91	H	3	XP	EVOPOLI	2170
92	M	3	YB	PR	1529
93	H	3	YB	PR	1843
94	M	3	YB	PRO	1946
95	H	3	YB	PDC	1410
96	M	3	YB	PS	4924
97	H	3	YB	PPD	3193
98	M	3	YQ	RD	3275
99	H	3	YQ	FREVS	3946
100	M	3	YQ	PCCH	9519
101	H	3	YQ	COMUNES	684
102	M	3	YQ	IGUALDAD	2047
103	H	3	YQ	IGUALDAD	3453
104	M	3	ZN	IND104	10252
105	H	3	ZN	IND105	6454
106	M	3	ZN	IND106	4242
107	H	3	ZN	IND107	1779
108	M	3	ZN	IND108	3266
109	M	3	ZR	PTR	1343
110	H	3	ZR	PTR	4564
111	M	3	ZR	PTR	1795
112	H	3	ZR	PTR	1510
113	M	3	ZR	PTR	680
114	H	3	ZR	PTR	759
115	M	3	ZZ	IND115	19736
116	H	3	ZZ	IND116	775
117	M	3	ZZ	IND117	4148
118	H	3	ZZ	IND118	555
119	M	3	ZZ	IND119	1765
120	H	3	ZZ	IND120	4487
121	H	3	ID3-40	IND121	2782
122	H	3	ID3-41	IND122	4476
123	M	3	ID3-42	IND123	7745
124	M	4	WJ	IND124	7913
125	H	4	WJ	IND125	2873
126	M	4	WJ	IND126	4433
127	H	4	WJ	IND127	1421
128	M	4	WJ	IND128	1152
129	H	4	WJ	IND129	632
130	M	4	XA	PEV	6383
131	M	4	XP	EVOPOLI	1558
132	H	4	XP	EVOPOLI	1363
133	M	4	XP	RN	4068
134	H	4	XP	RN	1230
135	M	4	XP	UDI	506
136	H	4	XP	UDI	906
137	M	4	YB	PS	2815
138	H	4	YB	PS	3080
139	M	4	YB	PDC	1695
140	H	4	YB	PPD	782
141	M	4	YB	PR	668
142	H	4	YB	PR	2962
143	M	4	YQ	PCCH	10175
144	H	4	YQ	PCCH	1672
145	M	4	YQ	FREVS	4562
146	M	4	ZT	IND146	3735
147	H	4	ZT	IND147	4069
148	M	4	ZT	IND148	1381
149	H	4	ZT	IND149	3732
150	M	4	ZT	IND150	1194
151	H	4	ZT	IND151	1011
152	H	4	ID4-29	IND152	4445
153	M	5	WB	IND153	6141
154	H	5	WB	IND154	2251
155	M	5	WB	IND155	2488
156	H	5	WB	IND156	2977
157	M	5	WB	IND157	2245
158	H	5	WB	IND158	5335
159	H	5	WB	IND159	2363
160	M	5	WD	IND160	22489
161	H	5	WD	IND161	11066
162	M	5	WD	IND162	5284
163	H	5	WD	IND163	6362
164	M	5	WD	IND164	5278
165	H	5	WD	IND165	3376
166	H	5	WD	IND166	4661
167	M	5	WI	IND167	6069
168	H	5	WI	IND168	2577
169	M	5	WI	IND169	4370
170	H	5	WI	IND170	2967
171	M	5	WI	IND171	4316
172	H	5	WI	IND172	3265
173	M	5	XA	PEV	7433
174	H	5	XA	PEV	3048
175	M	5	XP	UDI	7009
176	H	5	XP	UDI	3922
177	M	5	XP	EVOPOLI	3071
178	H	5	XP	EVOPOLI	1529
179	M	5	XP	RN	5211
180	H	5	XP	RN	8005
181	M	5	XP	RN	6283
182	M	5	YB	PDC	8259
183	H	5	YB	PDC	4104
184	M	5	YB	PS	3254
185	H	5	YB	PS	12545
186	M	5	YB	PPD	2715
187	H	5	YB	PR	3533
188	M	5	YB	PR	2333
189	M	5	YQ	CONVER.	13393
190	H	5	YQ	IGUALDAD	4971
191	M	5	YQ	FREVS	1673
192	H	5	YQ	PCCH	10076
193	M	5	YQ	COMUNES	5733
194	H	5	YQ	COMUNES	1555
195	M	6	S	IND195	11349
196	H	6	S	IND196	6766
197	M	6	S	IND197	5720
198	H	6	S	IND198	3759
199	M	6	S	IND199	6886
200	H	6	S	IND200	3789
201	M	6	S	IND201	5183
202	H	6	S	IND202	3086
203	M	6	S	IND203	7702
204	M	6	XG	PH	4613
205	H	6	XG	PH	1814
206	M	6	XP	REPUBL.	10235
207	H	6	XP	RN	10809
208	M	6	XP	RN	7384
209	H	6	XP	RN	3558
210	M	6	XP	REPUBL.	6462
211	H	6	XP	EVOPOLI	2589
212	M	6	XP	EVOPOLI	3130
213	H	6	XP	UDI	7490
214	M	6	XP	UDI	2288
215	M	6	YB	PDC	7773
216	H	6	YB	PDC	6833
217	M	6	YB	PS	6447
218	H	6	YB	PL	2022
219	M	6	YB	PPD	4330
220	H	6	YB	PS	8181
221	M	6	YB	PR	1235
222	H	6	YB	PPD	7655
223	M	6	YB	PL	3651
224	M	6	YK	IND224	8304
225	H	6	YK	IND225	2826
226	M	6	YK	IND226	5960
227	H	6	YK	IND227	3193
228	M	6	YK	IND228	4402
229	H	6	YK	IND229	3782
230	M	6	YK	IND230	8694
231	H	6	YK	IND231	4735
232	M	6	YQ	COMUNES	19118
233	H	6	YQ	COMUNES	2506
234	M	6	YQ	CONVER.	11860
235	H	6	YQ	CONVER.	3388
236	M	6	YQ	IGUALDAD	4433
237	H	6	YQ	PCCH	9080
238	M	6	YQ	PCCH	4149
239	H	6	YQ	RD	1348
240	M	6	YQ	RD	4849
241	M	6	ZB	UPA	1116
242	H	6	ZB	UPA	649
243	M	6	ZB	UPA	416
244	H	6	ZB	UPA	704
245	M	6	ZB	UPA	329
246	H	6	ZB	UPA	517
247	M	6	ZB	UPA	243
248	H	6	ZB	UPA	241
249	M	6	ZM	IND249	4267
250	H	6	ZM	IND250	1063
251	M	6	ZM	IND251	1306
252	H	6	ZM	IND252	2208
253	M	6	ZM	IND253	827
254	H	6	ZM	IND254	658
255	M	6	ZM	IND255	1743
256	H	6	ZM	IND256	1116
257	M	6	ZT	IND257	7469
258	H	6	ZT	IND258	3783
259	M	6	ZT	IND259	6171
260	H	6	ZT	IND260	2822
261	M	6	ZT	IND261	3074
262	H	6	ZT	IND262	2123
263	M	6	ZT	IND263	1709
264	H	6	ZT	IND264	3387
265	H	6	ID6-71	IND265	14830
266	M	7	D	IND266	1679
267	H	7	D	IND267	1444
268	M	7	D	IND268	970
269	H	7	D	IND269	673
270	M	7	D	IND270	1192
271	H	7	D	IND271	814
272	M	7	D	IND272	1011
273	H	7	D	IND273	2109
274	H	7	XG	PH	5676
275	M	7	XP	RN	5126
276	H	7	XP	RN	13774
277	M	7	XP	RN	2789
278	H	7	XP	UDI	12079
279	M	7	XP	UDI	7813
280	H	7	XP	UDI	21520
281	M	7	XP	EVOPOLI	3087
282	H	7	XP	EVOPOLI	4976
283	M	7	YB	PDC	5935
284	H	7	YB	PDC	4187
285	M	7	YB	PS	4260
286	H	7	YB	PS	4747
287	M	7	YB	PPD	5292
288	H	7	YB	PL	17783
289	M	7	YB	PL	3547
290	M	7	YI	IND290	1923
291	H	7	YI	IND291	837
292	M	7	YI	IND292	1121
293	H	7	YI	IND293	1014
294	M	7	YI	IND294	1221
295	H	7	YI	IND295	740
296	M	7	YI	IND296	668
297	H	7	YI	IND297	1161
298	M	7	YQ	COMUNES	6649
299	H	7	YQ	CONVER.	43490
300	M	7	YQ	IGUALDAD	2211
301	H	7	YQ	PCCH	12185
302	M	7	YQ	RD	2596
303	H	7	YQ	RD	9760
304	M	7	YQ	FREVS	1286
305	H	7	YQ	FREVS	1128
306	M	7	YT	IND306	4221
307	H	7	YT	IND307	2542
308	M	7	YT	IND308	1839
309	H	7	YT	IND309	1397
310	M	7	YT	IND310	651
311	H	7	YT	IND311	1528
312	M	7	YV	IND312	6155
313	H	7	YV	IND313	2602
314	M	7	YV	IND314	2749
315	H	7	YV	IND315	2805
316	M	7	YV	IND316	1892
317	H	7	YV	IND317	1427
318	M	7	YV	IND318	1804
319	H	7	YV	IND319	1606
320	M	7	ZB	UPA	1398
321	H	7	ZB	UPA	488
322	M	7	ZB	UPA	455
323	H	7	ZB	UPA	574
324	M	7	ZB	UPA	484
325	H	7	ZB	UPA	726
326	M	7	ZB	UPA	426
327	H	7	ZB	UPA	1070
328	M	7	ZN	IND328	18949
329	H	7	ZN	IND329	9074
330	M	7	ZN	IND330	15073
331	H	7	ZN	IND331	12611
332	M	7	ZN	IND332	5195
333	H	7	ZN	IND333	2405
334	M	7	ZN	IND334	2054
335	H	7	ZN	IND335	1958
336	M	7	ZR	PTR	1910
337	H	7	ZR	PTR	674
338	M	7	ZR	PTR	373
339	H	7	ZR	PTR	376
340	M	7	ZR	PTR	267
341	H	7	ZR	PTR	350
342	M	7	ZR	PTR	731
343	M	8	XA	PEV	8313
344	H	8	XA	PEV	2589
345	M	8	XA	PEV	6092
346	H	8	XA	PEV	4345
347	M	8	XG	PH	8879
348	M	8	XL	IND348	2999
349	H	8	XL	IND349	2551
350	M	8	XL	IND350	3517
351	H	8	XL	IND351	1700
352	M	8	XP	UDI	8351
353	H	8	XP	UDI	11288
354	M	8	XP	UDI	1937
355	H	8	XP	UDI	1780
356	M	8	XP	RN	7903
357	H	8	XP	RN	7586
358	M	8	XP	EVOPOLI	3048
359	H	8	XP	EVOPOLI	28380
360	M	8	YB	PRO	9621
361	H	8	YB	PRO	2391
362	M	8	YB	PS	9363
363	H	8	YB	PDC	7048
364	M	8	YB	PDC	3560
365	H	8	YB	PPD	11717
366	H	8	YB	PS	1727
367	M	8	YQ	COMUNES	10226
368	H	8	YQ	COMUNES	4579
369	M	8	YQ	PCCH	10964
370	H	8	YQ	PCCH	5446
371	M	8	YQ	FREVS	3476
372	H	8	YQ	FREVS	3356
373	M	8	YQ	RD	4397
374	H	8	YQ	RD	112126
375	M	8	YU	IND375	6538
376	H	8	YU	IND376	12149
377	M	8	YU	IND377	5116
378	H	8	YU	IND378	4939
379	M	8	YU	IND379	4607
380	H	8	YU	IND380	3094
381	M	8	YU	IND381	2427
382	H	8	YU	IND382	2820
383	M	8	ZB	UPA	2157
384	H	8	ZB	UPA	1643
385	M	8	ZB	UPA	765
386	H	8	ZB	UPA	775
387	H	8	ZB	UPA	862
388	M	8	ZN	IND388	18732
389	H	8	ZN	IND389	20433
390	M	8	ZN	IND390	8946
391	H	8	ZN	IND391	8391
392	M	8	ZN	IND392	11556
393	H	8	ZN	IND393	2803
394	M	8	ZN	IND394	13072
395	H	8	ZN	IND395	4487
396	M	8	ZR	PTR	2372
397	H	8	ZR	PTR	831
398	M	8	ZR	PTR	1002
399	H	8	ZR	PTR	438
400	M	8	ZR	PTR	651
401	H	8	ZR	PTR	658
402	M	9	N	IND402	18019
403	H	9	N	IND403	9148
404	M	9	N	IND404	16270
405	H	9	N	IND405	4586
406	M	9	N	IND406	17934
407	H	9	N	IND407	1466
408	M	9	N	IND408	6740
409	M	9	XA	PEV	5227
410	H	9	XA	PEV	1014
411	M	9	XA	PEV	2970
412	H	9	XA	PEV	1282
413	M	9	XA	PEV	2068
414	H	9	XA	PEV	1046
415	M	9	XP	UDI	7804
416	H	9	XP	UDI	11572
417	M	9	XP	UDI	4391
418	H	9	XP	RN	7195
419	M	9	XP	RN	2957
420	H	9	XP	EVOPOLI	1364
421	M	9	XP	EVOPOLI	1551
422	M	9	YB	PS	5740
423	H	9	YB	PDC	5257
424	M	9	YB	PRO	4312
425	H	9	YB	PPD	3594
426	M	9	YB	PPD	2724
427	H	9	YB	PS	9589
428	M	9	YB	PDC	2592
429	M	9	YQ	RD	5912
430	H	9	YQ	FREVS	5512
431	M	9	YQ	FREVS	2564
432	H	9	YQ	CONVER.	10352
433	M	9	YQ	CONVER.	4947
434	H	9	YQ	PCCH	9276
435	M	9	YQ	PCCH	24966
436	M	9	YV	IND436	9422
437	H	9	YV	IND437	4303
438	M	9	YV	IND438	5758
439	H	9	YV	IND439	3077
440	M	9	YV	IND440	3248
441	H	9	YV	IND441	3503
442	M	9	ZB	UPA	1772
443	H	9	ZB	UPA	553
444	H	9	ZB	UPA	340
445	M	9	ZH	IND445	12321
446	H	9	ZH	IND446	1267
447	M	9	ZH	IND447	2115
448	H	9	ZH	IND448	727
449	M	9	ZH	IND449	1313
450	H	9	ZH	IND450	2511
451	M	9	ZR	PTR	2976
452	H	9	ZR	PTR	1612
453	M	9	ZR	PTR	1141
454	H	9	ZR	PTR	918
455	M	9	ZR	PTR	346
456	H	9	ZR	PTR	1031
457	H	9	ID9-56	IND457	34911
458	H	10	YQ	RD	52653
459	M	10	XP	RN	39814
460	M	10	ZT	IND460	31762
461	H	10	YB	PS	21914
462	H	10	XP	EVOPOLI	19217
463	H	10	XP	RN	18568
464	M	10	ZL	IND464	14572
465	M	10	YQ	COMUNES	12533
466	H	10	ZN	IND466	10558
467	M	10	YQ	CONVER.	10338
468	M	10	ZN	IND468	9466
469	M	10	YQ	PCCH	9449
470	H	10	ZL	IND470	9269
471	H	10	YB	PDC	9192
472	H	10	ID10-78	IND472	8786
473	H	10	ZT	IND473	8295
474	M	10	YB	PDC	7773
475	M	10	YB	PPD	6868
476	M	10	ZL	IND476	6294
477	M	10	ZN	IND477	5905
478	M	10	H	IND478	5403
479	M	10	ZN	IND479	5385
480	M	10	YB	PS	5074
481	M	10	XP	RN	4506
482	H	10	ZN	IND482	4437
483	H	10	YQ	CONVER.	4326
484	M	10	ZN	IND484	4089
485	M	10	YQ	RD	3883
486	M	10	ZL	IND486	3762
487	M	10	XA	PEV	3679
488	M	10	XP	EVOPOLI	3531
489	H	10	YB	PPD	3150
490	H	10	ZN	IND490	3049
491	M	10	H	IND491	2888
492	M	10	H	IND492	2559
493	M	10	XP	UDI	2416
494	H	10	H	IND494	2329
495	H	10	YQ	FREVS	2338
496	M	10	ZT	IND496	2293
497	M	10	XA	PEV	2254
498	H	10	XP	UDI	2084
499	H	10	YQ	COMUNES	2071
500	M	10	XA	PEV	2057
501	M	10	ZT	IND501	2011
502	M	10	YB	PL	1957
503	H	10	H	IND503	1920
504	M	10	ZT	IND504	1871
505	H	10	XP	UDI	1770
506	H	10	ZL	IND506	1762
507	H	10	ZL	IND507	1741
508	H	10	ZR	PTR	1555
509	H	10	ZN	IND509	1439
510	H	10	H	IND510	1413
511	H	10	ZT	IND511	1400
512	M	10	H	IND512	1318
513	H	10	ZT	IND513	1251
514	H	10	XA	PEV	1199
515	H	10	XA	PEV	1156
516	H	10	ZT	IND516	1132
517	M	10	ZR	PTR	1114
518	H	10	YB	PL	1046
519	M	10	ZL	IND519	1000
520	M	10	ZR	PTR	975
521	H	10	XA	PEV	779
522	H	10	ZL	IND522	656
523	M	10	ZB	UPA	547
524	M	10	ZB	UPA	421
525	H	10	ZR	PTR	418
526	M	10	ZR	PTR	375
527	H	10	ZR	PTR	371
528	M	10	ZR	PTR	296
529	H	10	ZB	UPA	296
530	H	10	ZB	UPA	295
531	H	10	ZB	UPA	285
532	H	10	ZR	PTR	234
533	M	10	ZB	UPA	224
534	H	10	ZB	UPA	168
535	M	10	ZB	UPA	166
536	M	11	XA	PEV	3313
537	H	11	XA	PEV	2116
538	M	11	XA	PEV	2855
539	H	11	XA	PEV	1753
540	M	11	XA	PEV	1078
541	M	11	XF	IND541	1191
542	H	11	XF	IND542	913
543	M	11	XF	IND543	911
544	H	11	XF	IND544	559
545	M	11	XF	IND545	478
546	H	11	XF	IND546	774
547	M	11	XF	IND547	473
548	M	11	XG	PH	2941
549	M	11	XP	UDI	84360
550	H	11	XP	EVOPOLI	29433
551	M	11	XP	EVOPOLI	12477
552	H	11	XP	RN	16763
553	M	11	XP	RN	2129
554	H	11	XP	RN	4117
555	M	11	XP	UDI	18856
556	M	11	XT	IND556	12801
557	H	11	XT	IND557	3371
558	M	11	XT	IND558	4492
559	H	11	XT	IND559	4299
560	M	11	XT	IND560	6042
561	H	11	XT	IND561	1410
562	M	11	XT	IND562	3103
563	M	11	YB	PPD	11341
564	H	11	YB	CIUDADANOS	11022
565	M	11	YB	CIUDADANOS	3068
566	H	11	YB	PL	11906
567	M	11	YB	PL	3918
568	H	11	YB	PDC	2341
569	M	11	YB	PDC	7196
570	M	11	YQ	CONVER.	21563
571	H	11	YQ	FREVS	3707
572	M	11	YQ	RD	4409
573	H	11	YQ	PCCH	8383
574	M	11	YQ	IGUALDAD	3957
575	H	11	YQ	IGUALDAD	3028
576	M	11	YQ	COMUNES	4402
577	M	11	ZB	UPA	1001
578	M	11	ZT	IND578	2683
579	H	11	ZT	IND579	3250
580	M	11	ZT	IND580	1808
581	H	11	ZT	IND581	1272
582	M	11	ZT	IND582	2141
583	H	11	ZT	IND583	765
584	H	11	ZT	IND584	724
585	M	11	ZY	IND585	10679
586	H	11	ZY	IND586	10402
587	M	11	ZY	IND587	1207
588	H	11	ZY	IND588	3035
589	M	11	ZY	IND589	488
590	H	11	ZY	IND590	1521
591	H	11	ZY	IND591	1673
592	H	11	ID11-57	IND592	5599
593	H	11	ID11-58	IND593	2733
594	H	11	ID11-59	IND594	11048
595	M	12	T	IND595	22993
596	H	12	T	IND596	4084
597	M	12	T	IND597	3530
598	H	12	T	IND598	1794
599	M	12	T	IND599	1985
600	H	12	T	IND600	2511
601	M	12	T	IND601	1687
602	M	12	XA	PEV	4074
603	H	12	XA	PEV	1245
604	M	12	XA	PEV	2143
605	H	12	XA	PEV	1075
606	M	12	XA	PEV	2527
607	H	12	XA	PEV	811
608	M	12	XA	PEV	3197
609	H	12	XG	PH	4215
610	M	12	XP	RN	9298
611	H	12	XP	RN	13845
612	M	12	XP	RN	3385
613	H	12	XP	UDI	2281
614	M	12	XP	UDI	15095
615	H	12	XP	EVOPOLI	2725
616	M	12	XP	EVOPOLI	17480
617	M	12	YB	PL	4315
618	H	12	YB	PDC	3049
619	M	12	YB	PPD	1962
620	H	12	YB	PR	1657
621	M	12	YB	PS	4663
622	H	12	YB	CIUDADANOS	2242
623	M	12	YB	PRO	2449
624	M	12	YL	IND624	20979
625	H	12	YL	IND625	19442
626	M	12	YL	IND626	12490
627	H	12	YL	IND627	6069
628	M	12	YL	IND628	6092
629	H	12	YL	IND629	3170
630	M	12	YQ	RD	28265
631	H	12	YQ	RD	2493
632	M	12	YQ	PCCH	10153
633	H	12	YQ	PCCH	16078
634	M	12	YQ	FREVS	1116
635	H	12	YQ	IGUALDAD	1531
636	M	12	YQ	IGUALDAD	3712
637	M	12	YV	IND637	12761
638	H	12	YV	IND638	47217
639	M	12	YV	IND639	4752
640	H	12	YV	IND640	2709
641	M	12	YV	IND641	2284
642	H	12	YV	IND642	2543
643	H	12	YV	IND643	1553
644	M	12	ZB	UPA	971
645	H	12	ZB	UPA	344
646	M	12	ZB	UPA	606
647	H	12	ZB	UPA	251
648	M	12	ZB	UPA	221
649	H	12	ZB	UPA	198
650	M	12	ZR	PTR	2831
651	H	12	ZR	PTR	490
652	M	12	ZR	PTR	1114
653	H	12	ZR	PTR	272
654	M	12	ZR	PTR	467
655	H	12	ZR	PTR	218
656	M	12	ID12-62	IND656	8246
657	H	12	ID12-63	IND657	8217
658	M	13	XA	PEV	4758
659	H	13	XA	PEV	1026
660	M	13	XA	PEV	1754
661	H	13	XA	PEV	1270
662	M	13	XA	PEV	1904
663	H	13	XA	PEV	881
664	M	13	XH	IND664	2352
665	H	13	XH	IND665	1003
666	M	13	XH	IND666	3796
667	H	13	XH	IND667	1274
668	M	13	XH	IND668	1307
669	M	13	XP	RN	8773
670	H	13	XP	REPUBL.	3537
671	M	13	XP	RN	4510
672	H	13	XP	REPUBL.	4947
673	M	13	XP	EVOPOLI	2421
674	H	13	XP	EVOPOLI	4884
675	M	13	YB	PRO	3313
676	H	13	YB	PL	4521
677	M	13	YB	PS	29232
678	H	13	YB	PPD	4681
679	M	13	YB	PR	2673
680	H	13	YB	PDC	4507
681	M	13	YQ	CONVER.	13891
682	H	13	YQ	PCCH	11260
683	M	13	YQ	FREVS	1748
684	H	13	YQ	IGUALDAD	3011
685	M	13	YQ	COMUNES	3361
686	H	13	YQ	RD	3152
687	M	13	YS	IND687	7700
688	H	13	YS	IND688	2346
689	M	13	YS	IND689	5813
690	H	13	YS	IND690	4196
691	M	13	YS	IND691	3040
692	H	13	YS	IND692	4855
693	M	13	ZB	UPA	957
694	H	13	ZB	UPA	433
695	M	13	ZB	UPA	271
696	H	13	ZB	UPA	393
697	M	13	ZN	IND697	19887
698	H	13	ZN	IND698	19434
699	M	13	ZN	IND699	9009
700	H	13	ZN	IND700	4340
701	M	13	ZN	IND701	3074
702	H	13	ZN	IND702	2993
703	M	13	ZR	PTR	3277
704	H	13	ZR	PTR	1229
705	M	13	ZR	PTR	916
706	H	13	ZR	PTR	663
707	M	13	ZR	PTR	440
708	M	14	XA	PEV	8443
709	H	14	XA	PEV	3355
710	M	14	XA	PEV	6382
711	M	14	XP	UDI	3760
712	H	14	XP	UDI	19081
713	M	14	XP	REPUBL.	5150
714	H	14	XP	REPUBL.	9455
715	M	14	XP	RN	7910
716	H	14	XP	RN	6431
717	M	14	YB	PS	12478
718	H	14	YB	PDC	8095
719	M	14	YB	PDC	9160
720	H	14	YB	PR	22079
721	M	14	YB	PR	3849
722	H	14	YB	PS	4829
723	M	14	YQ	PCCH	10452
724	H	14	YQ	CONVER.	29620
725	M	14	YQ	RD	16211
726	H	14	YQ	IGUALDAD	3663
727	M	14	YQ	FREVS	7976
728	H	14	YQ	COMUNES	5354
729	M	14	ZN	IND729	14951
730	H	14	ZN	IND730	26855
731	M	14	ZN	IND731	5923
732	H	14	ZN	IND732	6306
733	M	14	ZN	IND733	8780
734	M	14	ZT	IND734	15735
735	H	14	ZT	IND735	7616
736	M	14	ZT	IND736	5203
737	H	14	ZT	IND737	2488
738	M	14	ZT	IND738	5823
739	M	15	P	IND739	3382
740	H	15	P	IND740	8888
741	M	15	P	IND741	2577
742	H	15	P	IND742	6633
743	M	15	P	IND743	1431
744	M	15	XA	PEV	4056
745	H	15	XA	PEV	1151
746	M	15	XA	PEV	934
747	H	15	XA	PEV	2310
748	M	15	XA	PEV	1769
749	H	15	XA	PEV	2146
750	M	15	XP	UDI	7412
751	H	15	XP	UDI	5298
752	M	15	XP	UDI	2929
753	H	15	XP	EVOPOLI	2470
754	M	15	XP	RN	3027
755	H	15	XP	RN	8471
756	M	15	YB	PPD	3304
757	H	15	YB	PS	7236
758	M	15	YB	PS	5437
759	H	15	YB	PDC	2031
760	M	15	YB	PDC	2448
761	H	15	YB	PPD	4928
762	M	15	YP	IND762	17072
763	H	15	YP	IND763	6292
764	M	15	YP	IND764	3817
765	H	15	YP	IND765	4227
766	H	15	YP	IND766	3712
767	M	15	YQ	FREVS	3244
768	H	15	YQ	FREVS	1904
769	M	15	YQ	CONVER.	6012
770	H	15	YQ	CONVER.	2560
771	M	15	YQ	RD	2876
772	H	15	YQ	PCCH	4945
773	M	15	ZB	UPA	1447
774	H	15	ZB	UPA	5501
775	M	15	ZB	UPA	1012
776	H	15	ZB	UPA	717
777	M	15	ZB	UPA	396
778	H	15	ID15-40	IND778	5310
779	H	15	ID15-41	IND779	4447
780	M	15	ID15-42	IND780	15392
781	M	16	XA	PEV	4052
782	H	16	XA	PEV	2879
783	M	16	XP	EVOPOLI	4867
784	H	16	XP	RN	6428
785	M	16	XP	EVOPOLI	4243
786	H	16	XP	RN	4362
787	M	16	XP	UDI	1437
788	H	16	XP	UDI	11789
789	M	16	XV	IND789	3204
790	H	16	XV	IND790	4468
791	M	16	XV	IND791	2528
792	H	16	XV	IND792	2106
793	M	16	XV	IND793	4089
794	M	16	YB	PS	3741
795	H	16	YB	PR	1336
796	M	16	YB	PPD	4977
797	H	16	YB	PS	4503
798	M	16	YB	PR	2915
799	H	16	YB	PDC	3612
800	M	16	YQ	RD	4460
801	H	16	YQ	PCCH	4211
802	M	16	YQ	FREVS	2334
803	H	16	YQ	FREVS	10802
804	M	16	YQ	COMUNES	3123
805	H	16	YQ	CONVER.	2404
806	M	16	YZ	IND806	6403
807	H	16	YZ	IND807	2992
808	M	16	YZ	IND808	3924
809	H	16	YZ	IND809	1829
810	M	16	YZ	IND810	2554
811	H	16	YZ	IND811	3182
812	H	16	ZB	UPA	1111
813	M	16	ID16-33	IND813	6792
814	M	16	ID16-34	IND814	8541
815	M	17	XI	IND815	12495
816	H	17	XI	IND816	4575
817	M	17	XI	IND817	2980
818	H	17	XI	IND818	2592
819	M	17	XI	IND819	2642
820	H	17	XI	IND820	1833
821	M	17	XI	IND821	4168
822	H	17	XI	IND822	2284
823	M	17	XP	EVOPOLI	18094
824	H	17	XP	EVOPOLI	8739
825	M	17	XP	UDI	3536
826	H	17	XP	UDI	11334
827	M	17	XP	UDI	1835
828	H	17	XP	REPUBL.	5062
829	M	17	XP	RN	3849
830	H	17	XP	RN	5037
831	M	17	YB	PS	3820
832	H	17	YB	PS	3575
833	M	17	YB	PRO	1284
834	H	17	YB	PPD	4737
835	M	17	YB	PR	2618
836	H	17	YB	PR	2549
837	M	17	YB	PDC	3605
838	H	17	YB	PDC	9161
839	M	17	YO	IND839	2312
840	H	17	YO	IND840	1976
841	M	17	YO	IND841	2396
842	H	17	YO	IND842	1287
843	M	17	YO	IND843	1655
844	H	17	YO	IND844	924
845	H	17	YO	IND845	871
846	M	17	YQ	IGUALDAD	4834
847	H	17	YQ	IGUALDAD	2949
848	M	17	YQ	PCCH	2212
849	H	17	YQ	PCCH	7115
850	M	17	YQ	RD	2401
851	H	17	YQ	RD	2859
852	M	17	YQ	FREVS	1199
853	H	17	YQ	FREVS	23405
854	M	17	ZN	IND854	6292
855	H	17	ZN	IND855	2731
856	M	17	ZN	IND856	7375
857	H	17	ZN	IND857	3388
858	M	17	ZN	IND858	1786
859	H	17	ZN	IND859	4390
860	M	17	ZN	IND860	2878
861	M	17	ZT	IND861	4043
862	H	17	ZT	IND862	2292
863	M	17	ZT	IND863	4292
864	H	17	ZT	IND864	2100
865	M	17	ZT	IND865	871
866	H	17	ZT	IND866	3052
867	H	17	ZT	IND867	1354
868	M	18	XP	RN	11890
869	H	18	XP	RN	6051
870	M	18	XP	REPUBL.	1475
871	H	18	XP	REPUBL.	5084
872	M	18	XP	UDI	6950
873	H	18	XP	UDI	2758
874	M	18	YB	PS	4289
875	H	18	YB	PDC	4943
876	M	18	YB	PDC	4587
877	H	18	YB	CIUDADANOS	1344
878	M	18	YB	CIUDADANOS	2432
879	H	18	YB	PS	6139
880	M	18	YQ	RD	8506
881	H	18	YQ	RD	2623
882	M	18	YQ	RD	1129
883	H	18	YQ	PCCH	3211
884	M	18	YQ	PCCH	2046
885	M	18	ZD	IND885	11777
886	H	18	ZD	IND886	5285
887	M	18	ZD	IND887	7802
888	H	18	ZD	IND888	7415
889	M	18	ZD	IND889	3590
890	M	19	XA	PEV	3160
891	H	19	XA	PEV	1214
892	M	19	XA	PEV	1507
893	H	19	XA	PEV	813
894	M	19	XJ	IND894	8820
895	H	19	XJ	IND895	16095
896	M	19	XJ	IND896	2322
897	H	19	XJ	IND897	2054
898	M	19	XJ	IND898	2142
899	H	19	XJ	IND899	931
900	M	19	XP	UDI	6117
901	H	19	XP	UDI	22170
902	M	19	XP	EVOPOLI	3585
903	H	19	XP	EVOPOLI	1290
904	M	19	XP	RN	4102
905	H	19	XP	RN	1792
906	M	19	YB	PPD	2811
907	H	19	YB	PPD	11067
908	M	19	YB	PPD	1029
909	H	19	YB	PDC	5340
910	M	19	YB	PDC	1710
911	M	19	YF	IND911	6988
912	H	19	YF	IND912	4630
913	M	19	YF	IND913	2523
914	H	19	YF	IND914	1115
915	M	19	YF	IND915	2194
916	H	19	YF	IND916	2743
917	M	19	YQ	PCCH	7335
918	H	19	YQ	PCCH	2494
919	M	19	YQ	IGUALDAD	2066
920	H	19	YQ	IGUALDAD	860
921	M	19	YQ	RD	2874
922	H	19	YQ	RD	3248
923	M	19	YX	PCC	1387
924	H	19	YX	PCC	651
925	M	19	YX	PCC	2239
926	H	19	YX	PCC	426
927	M	19	YX	PCC	1271
928	H	19	YX	PCC	519
929	H	19	ID19-40	IND929	11036
930	M	20	I	IND930	10360
931	H	20	I	IND931	3359
932	M	20	I	IND932	3982
933	H	20	I	IND933	3426
934	M	20	I	IND934	5456
935	H	20	I	IND935	3068
936	M	20	I	IND936	4580
937	H	20	I	IND937	2060
938	M	20	XA	PEV	3382
939	H	20	XA	PEV	2207
940	M	20	XA	PEV	3542
941	H	20	XA	PEV	1962
942	M	20	XA	PEV	2897
943	H	20	XA	PEV	4644
944	M	20	XA	PEV	2747
945	H	20	XA	PEV	2854
946	M	20	XP	EVOPOLI	16974
947	H	20	XP	EVOPOLI	4896
948	M	20	XP	RN	8323
949	H	20	XP	RN	9274
950	M	20	XP	RN	2106
951	H	20	XP	UDI	5568
952	M	20	XP	UDI	7757
953	H	20	XP	UDI	2875
954	M	20	YB	PPD	12864
955	H	20	YB	PS	10942
956	M	20	YB	PS	3219
957	H	20	YB	PR	3059
958	M	20	YB	PDC	7437
959	H	20	YB	PRO	2387
960	M	20	YB	PRO	1313
961	H	20	YB	PDC	2002
962	M	20	YQ	IGUALDAD	4939
963	H	20	YQ	IGUALDAD	2481
964	M	20	YQ	PCCH	9729
965	H	20	YQ	PCCH	3931
966	M	20	YQ	FREVS	1668
967	H	20	YQ	FREVS	1381
968	M	20	YQ	RD	18515
969	H	20	YQ	RD	2379
970	M	20	ZB	UPA	1779
971	H	20	ZB	UPA	1051
972	M	20	ZN	IND972	11507
973	H	20	ZN	IND973	6843
974	M	20	ZN	IND974	3098
975	H	20	ZN	IND975	3394
976	M	20	ZN	IND976	2059
977	H	20	ZN	IND977	3100
978	M	20	ZN	IND978	2386
979	H	20	ZN	IND979	2712
980	M	20	ZW	IND980	7336
981	H	20	ZW	IND981	9605
982	M	20	ZW	IND982	7799
983	H	20	ZW	IND983	1452
984	M	20	ZW	IND984	1541
985	H	20	ZW	IND985	1160
986	M	20	ZW	IND986	5097
987	H	20	ZW	IND987	1773
988	H	20	ID20-59	IND988	12318
989	H	20	ID20-60	IND989	12481
990	M	21	F	IND990	7878
991	H	21	F	IND991	8322
992	M	21	F	IND992	2667
993	H	21	F	IND993	3721
994	H	21	F	IND994	1933
995	M	21	XA	PEV	3571
996	H	21	XA	PEV	1687
997	M	21	XA	PEV	2132
998	H	21	XA	PEV	2164
999	M	21	XA	PEV	1064
1000	H	21	XA	PEV	802
1001	M	21	XP	RN	8549
1002	H	21	XP	RN	5275
1003	M	21	XP	UDI	2893
1004	H	21	XP	UDI	6191
1005	M	21	XP	EVOPOLI	2574
1006	H	21	XP	EVOPOLI	8091
1007	M	21	YB	PDC	3801
1008	H	21	YB	PPD	7592
1009	M	21	YB	PR	3869
1010	H	21	YB	PS	4127
1011	M	21	YB	PPD	3557
1012	H	21	YB	PDC	4982
1013	M	21	YQ	PCCH	11160
1014	H	21	YQ	PCCH	5770
1015	M	21	YQ	PCCH	4621
1016	H	21	YQ	PCCH	3928
1017	M	21	YQ	PCCH	2698
1018	M	21	YV	IND1018	8188
1019	H	21	YV	IND1019	5944
1020	M	21	YV	IND1020	4409
1021	H	21	YV	IND1021	2721
1022	M	21	YV	IND1022	3407
1023	H	21	YV	IND1023	3326
1024	M	21	YX	PCC	6967
1025	H	21	YX	PCC	3086
1026	M	21	YX	PCC	1521
1027	H	21	YX	PCC	999
1028	M	21	ZB	UPA	2275
1029	M	22	XP	RN	2021
1030	H	22	XP	RN	5269
1031	M	22	XP	EVOPOLI	1459
1032	H	22	XP	UDI	6217
1033	M	22	XP	EVOPOLI	1030
1034	H	22	XP	UDI	7929
1035	M	22	YB	PPD	2468
1036	H	22	YB	PR	1511
1037	M	22	YB	PDC	788
1038	H	22	YB	PDC	11453
1039	M	22	YB	PPD	1554
1040	M	22	YQ	IGUALDAD	3064
1041	M	22	YX	PCC	1624
1042	H	22	YX	PCC	1364
1043	M	22	YX	PCC	565
1044	H	22	YX	PCC	1285
1045	M	22	ZE	IND1045	2943
1046	H	22	ZE	IND1046	2032
1047	M	22	ZE	IND1047	1505
1048	H	22	ZE	IND1048	1521
1049	H	22	ZE	IND1049	857
1050	M	22	ZK	IND1050	3515
1051	H	22	ZK	IND1051	1876
1052	M	22	ZK	IND1052	1829
1053	H	22	ZK	IND1053	1782
1054	H	22	ZK	IND1054	1689
1055	M	22	ZT	IND1055	3406
1056	H	22	ZT	IND1056	3487
1057	M	22	ZT	IND1057	856
1058	H	22	ZT	IND1058	1120
1059	H	22	ZT	IND1059	1571
1060	M	23	J	IND1060	7130
1061	H	23	J	IND1061	7224
1062	M	23	J	IND1062	2463
1063	H	23	J	IND1063	1865
1064	M	23	J	IND1064	2632
1065	H	23	J	IND1065	1743
1066	M	23	J	IND1066	2560
1067	M	23	XA	PEV	2591
1068	H	23	XA	PEV	728
1069	M	23	XA	PEV	1813
1070	H	23	XA	PEV	602
1071	M	23	XA	PEV	1156
1072	H	23	XA	PEV	1901
1073	M	23	XP	RN	4882
1074	H	23	XP	RN	15468
1075	M	23	XP	RN	4682
1076	H	23	XP	UDI	6345
1077	M	23	XP	UDI	760
1078	H	23	XP	EVOPOLI	1201
1079	M	23	XP	EVOPOLI	2895
1080	M	23	YB	PDC	3594
1081	H	23	YB	PPD	5701
1082	M	23	YB	PS	1930
1083	H	23	YB	PRO	933
1084	M	23	YB	PPD	3881
1085	H	23	YB	PDC	4158
1086	M	23	YB	PRO	518
1087	M	23	YQ	IGUALDAD	8626
1088	H	23	YQ	IGUALDAD	1155
1089	M	23	YQ	PCCH	4338
1090	H	23	YQ	PCCH	1108
1091	M	23	YQ	FREVS	2156
1092	M	23	YX	PNC	1893
1093	H	23	YX	PNC	1014
1094	M	23	YX	PNC	1143
1095	H	23	YX	PNC	851
1096	M	23	YX	PNC	721
1097	H	23	YX	PNC	529
1098	M	23	ZK	IND1098	2697
1099	H	23	ZK	IND1099	2067
1100	M	23	ZK	IND1100	3993
1101	H	23	ZK	IND1101	1667
1102	M	23	ZK	IND1102	3936
1103	H	23	ZK	IND1103	1663
1104	M	23	ZR	PTR	1976
1105	H	23	ZR	PTR	664
1106	M	23	ZR	PTR	574
1107	H	23	ZR	PTR	477
1108	M	23	ZT	IND1108	5556
1109	H	23	ZT	IND1109	3805
1110	M	23	ZT	IND1110	3128
1111	H	23	ZT	IND1111	1464
1112	M	23	ZT	IND1112	1069
1113	H	23	ZT	IND1113	1163
1114	M	23	ZT	IND1114	1823
1115	H	23	ID23-56	IND1115	9785
1116	M	24	W	IND1116	5733
1117	H	24	W	IND1117	1088
1118	M	24	W	IND1118	1330
1119	H	24	W	IND1119	696
1120	M	24	W	IND1120	1107
1121	M	24	XA	PEV	2552
1122	H	24	XA	PEV	797
1123	M	24	XA	PEV	1197
1124	H	24	XA	PEV	764
1125	M	24	XD	IND1125	5744
1126	H	24	XD	IND1126	1258
1127	M	24	XD	IND1127	3913
1128	H	24	XD	IND1128	981
1129	M	24	XD	IND1129	2152
1130	H	24	XD	IND1130	1296
1131	M	24	XP	UDI	3802
1132	H	24	XP	UDI	6210
1133	M	24	XP	EVOPOLI	2518
1134	H	24	XP	EVOPOLI	5031
1135	M	24	XP	RN	2956
1136	H	24	XP	RN	4141
1137	M	24	YB	PS	12108
1138	H	24	YB	PPD	1739
1139	M	24	YB	PDC	1676
1140	H	24	YB	PS	11208
1141	M	24	YB	PR	1081
1142	H	24	YB	PDC	3252
1143	M	24	YQ	RD	4854
1144	H	24	YQ	RD	1407
1145	M	24	YQ	RD	2109
1146	H	24	YQ	PCCH	2294
1147	M	24	YQ	PCCH	1198
1148	H	24	YQ	PCCH	3761
1149	M	24	YX	PCC	1663
1150	H	24	YX	PCC	607
1151	H	24	YX	PCC	1129
1152	M	24	ZT	IND1152	4947
1153	H	24	ZT	IND1153	1824
1154	M	24	ZT	IND1154	953
1155	H	24	ZT	IND1155	1177
1156	M	25	Q	IND1156	5257
1157	H	25	Q	IND1157	1385
1158	M	25	XP	UDI	4266
1159	H	25	XP	UDI	2918
1160	M	25	XP	EVOPOLI	2612
1161	H	25	XP	RN	19484
1162	M	25	XP	REPUBL.	2534
1163	M	25	YB	PL	2849
1164	H	25	YB	PDC	3505
1165	M	25	YB	PL	4369
1166	H	25	YB	PS	2011
1167	M	25	YB	PDC	2381
1168	H	25	YB	PS	5826
1169	M	25	YQ	RD	6413
1170	H	25	YQ	RD	3405
1171	M	25	YQ	PCCH	2705
1172	H	25	YQ	PCCH	1353
1173	M	25	YQ	COMUNES	1323
1174	H	25	YQ	COMUNES	409
1175	M	25	ZQ	IND1175	2491
1176	H	25	ZQ	IND1176	1021
1177	M	25	ZQ	IND1177	1269
1178	H	25	ZQ	IND1178	1246
1179	M	25	ZT	IND1179	4667
1180	H	25	ZT	IND1180	4395
1181	H	25	ZT	IND1181	2579
1182	H	25	ID25-27	IND1182	4112
1183	M	25	ID25-28	IND1183	3696
1184	M	26	G	IND1184	10604
1185	H	26	G	IND1185	3278
1186	M	26	G	IND1186	2759
1187	H	26	G	IND1187	7819
1188	M	26	G	IND1188	1057
1189	H	26	G	IND1189	1392
1190	M	26	XP	UDI	5039
1191	H	26	XP	UDI	5252
1192	M	26	XP	EVOPOLI	3223
1193	H	26	XP	REPUBL.	5396
1194	M	26	XP	RN	3653
1195	H	26	XP	RN	5875
1196	M	26	YB	PL	4792
1197	H	26	YB	PS	13824
1198	M	26	YB	PDC	4199
1199	H	26	YB	PL	1333
1200	M	26	YB	PS	5319
1201	H	26	YB	PPD	1226
1202	M	26	YQ	RD	6803
1203	H	26	YQ	RD	3160
1204	M	26	YQ	PCCH	1611
1205	H	26	YQ	PCCH	1645
1206	M	26	YQ	COMUNES	2117
1207	H	26	YQ	COMUNES	1293
1208	M	26	YX	PNC	2120
1209	H	26	YX	PNC	1109
1210	M	26	YX	PNC	820
1211	M	26	ZA	IND1211	4806
1212	H	26	ZA	IND1212	6400
1213	M	26	ZA	IND1213	2337
1214	H	26	ZA	IND1214	2372
1215	M	26	ZA	IND1215	1256
1216	H	26	ZA	IND1216	1164
1217	M	26	ID26-34	IND1217	5917
1218	M	27	XC	IND1218	1275
1219	H	27	XC	IND1219	1812
1220	M	27	XC	IND1220	294
1221	H	27	XC	IND1221	816
1222	H	27	XC	IND1222	846
1223	M	27	XP	EVOPOLI	3404
1224	H	27	XP	UDI	1138
1225	M	27	XP	UDI	1339
1226	H	27	XP	RN	2284
1227	M	27	XP	EVOPOLI	522
1228	M	27	YB	PS	2462
1229	H	27	YB	PS	4291
1230	M	27	YB	PPD	1829
1231	H	27	YB	PR	503
1232	M	27	YB	PDC	205
1233	H	27	YB	PDC	755
1234	M	27	YD	IND1234	777
1235	H	27	YD	IND1235	1259
1236	M	27	YD	IND1236	219
1237	H	27	YD	IND1237	594
1238	H	27	YD	IND1238	450
1239	M	27	YQ	RD	2259
1240	H	27	YQ	RD	934
1241	M	27	YQ	PCCH	1306
1242	H	27	YQ	PCCH	668
1243	H	27	YQ	PCCH	478
1244	H	28	XG	PH	976
1245	M	28	XM	IND1245	813
1246	H	28	XM	IND1246	6188
1247	M	28	XM	IND1247	562
1248	H	28	XM	IND1248	811
1249	M	28	XM	IND1249	567
1250	H	28	XM	IND1250	1232
1251	M	28	XP	RN	1386
1252	H	28	XP	UDI	4197
1253	M	28	XP	RN	327
1254	H	28	XP	UDI	1729
1255	M	28	XP	EVOPOLI	531
1256	H	28	XP	EVOPOLI	1778
1257	M	28	XR	IND1257	2695
1258	H	28	XR	IND1258	1573
1259	M	28	YB	PRO	1218
1260	H	28	YB	PDC	2231
1261	M	28	YB	PR	818
1262	H	28	YB	PDC	251
1263	M	28	YB	PS	567
1264	H	28	YB	PS	1964
1265	M	28	YE	IND1265	1111
1266	H	28	YE	IND1266	1202
1267	H	28	YE	IND1267	928
1268	M	28	YQ	CONVER.	3029
1269	H	28	YQ	CONVER.	990
1270	M	28	YQ	CONVER.	2452
1271	H	28	YQ	PCCH	928
1272	M	28	YQ	PCCH	771
1273	H	28	YQ	PCCH	1106
1274	M	28	ZI	IND1274	4259
1275	H	28	ZI	IND1275	2185
1276	M	28	ZI	IND1276	551
1277	H	28	ZI	IND1277	1490
1278	H	28	ZI	IND1278	1025
